# Supplementary material for: Z-Scheme Heterojunction of 3-Dimensional Hierarchical Bi3O4Cl/Bi5O7I for a Significant Enhancement in the Photocatalytic Degradation of Organic Pollutants (RhB and BPA)
Source: MDPI journal article supplement (doi:10.3390/nano12050767), 2022-02-24
Supplement: s1 [file s1]

## Supplementary material

# Z-Scheme Heterojunction of 3-Dimensional Hierarchical $\text{Bi}_3\text{O}_4\text{Cl}/\text{Bi}_5\text{O}_7\text{I}$ for a Significant Enhancement in the Photocatalytic Degradation of Organic Pollutants (RhB and BPA)

Syed Taj Ud Din, Hankyu Lee and Woochul Yang \*

Department of Physics, Dongguk University, Seoul 04620, Korea; tajuddins.phy@gmail.com (S.T.U.D.); lhk0022@naver.com (H.L.)

\* Correspondence: wyang@dongguk.edu; Tel.: +82-222-603-444

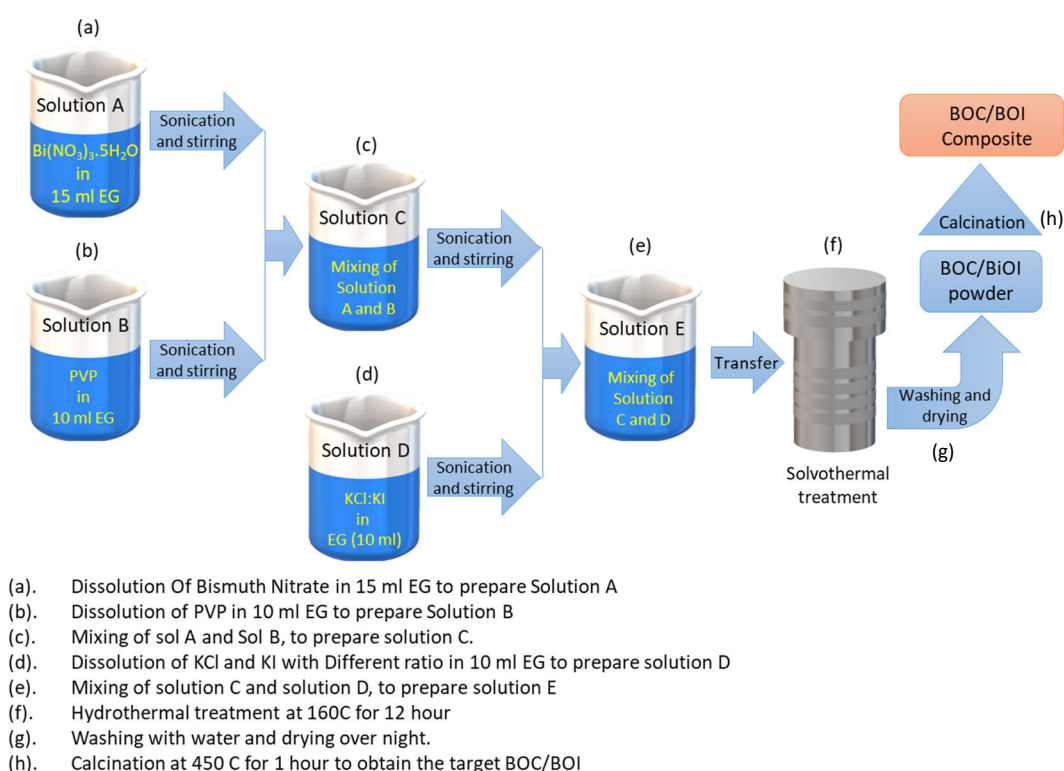

**Figure S1.** Steps involved in the synthesis of heterostructure BOC/BOI composite.

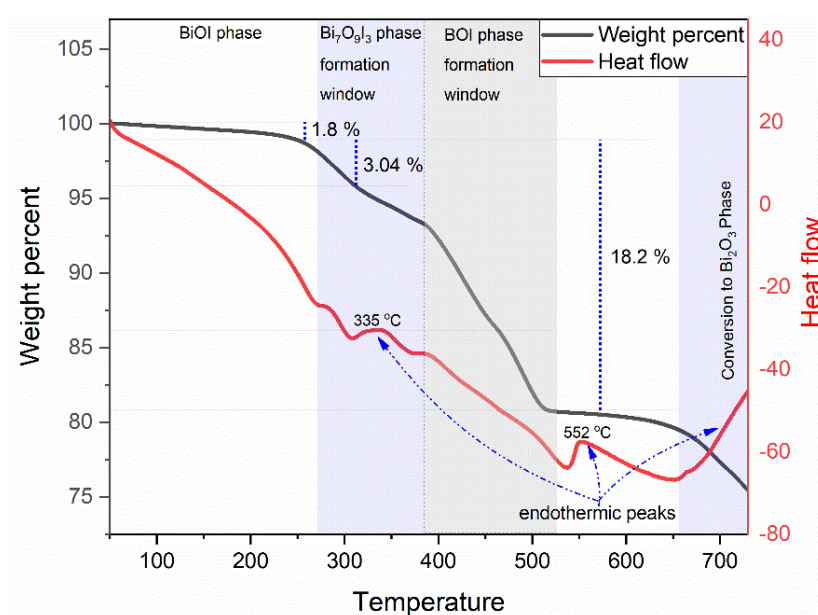

Figure S2. TGA and DSC plot of BiOI photocatalyst.

### 1. Thermogravimetric analysis

In the calcination process, TGA is an effective technique to observe the phase transformation and weight-loss% in a material. Thus, the specific calcination temperature for the desired phase formation of our targeted materials was determined through the TGA measurement. This measurement was conducted in the temperature range from 50 °C to 750 °C of the hydrothermally prepared BiOI raw powder. Figure S2 shows the TGA (weight-loss%) and DSC (endothermic and exothermic) plot of the raw powder. The obtained TGA plot is divided into four segments, wherein segment I, segment II, segment III, and segment IV correspond to the temperature ranging from 50 °C to 270 °C, from 270 °C to 390 °C, from 390 °C to 530 °C, and from 530 °C to 620 °C, respectively. In segment I, it can be observed that BiOI lost 1.8% of its initial weight due to the existence of water molecules and volatile compounds [1,2]. In segment II, the decomposition of EG molecules and deiodination occurred, which reduced the weight by 3.8% [3,4]. Due to deiodination in this segment, the heat flow curve showed a small endothermic peak at 335 °C, indicating that the BiOI phase is transformed into  $\text{Bi}_7\text{O}_9\text{I}_3$  [5]. In Segment III, it can be observed that the deiodination process continued, which in turn reduced the weight by 18.02% and created an endothermic peak at 552 °C, confirming the phase transformation from  $\text{Bi}_7\text{O}_9\text{I}_3$  to  $\text{Bi}_5\text{O}_7\text{I}$  (BOI) [6]. Lastly, in segment IV, it is observed that there is no loss in weight %, thus showing the thermal stability of the targeted BOI photocatalyst. However, it can be seen that by increasing the temperature above 620 °C, the loss in weight % is re-started. Further, a dominant endothermic peak at 650 °C is created, which confirmed the conversion of BOI to the  $\text{Bi}_2\text{O}_3$  phase [7]. Thus, based on TGA analysis, it is confirmed that the targeted phase of the hetero-structured composite, i.e., the BOC/BOI composite, can be formed when the BOC/BiOI raw powder is calcined for 1 h at 450 °C [8].

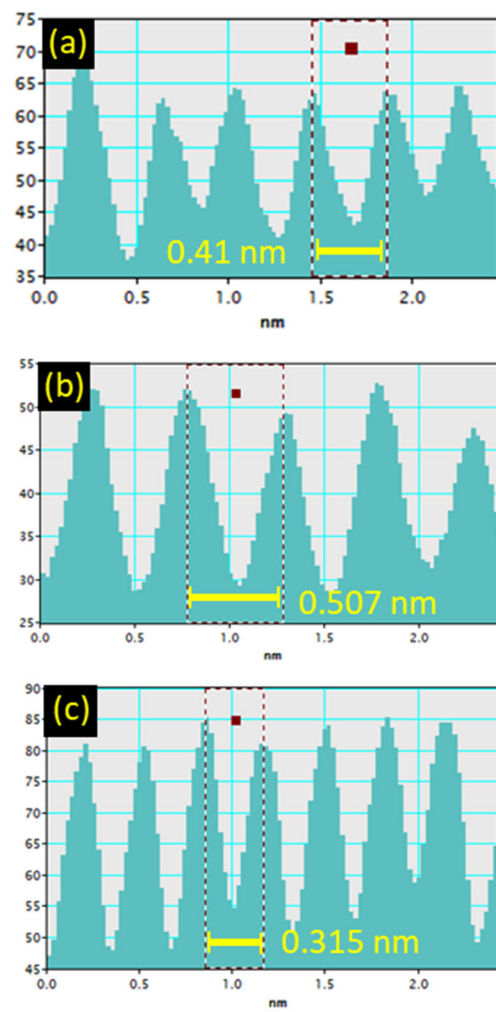

**Figure S3.** Intensity line profiles of the inverse FFT of (a, b) BOC and BOI (c) in the BOC/BOI heterostructure.

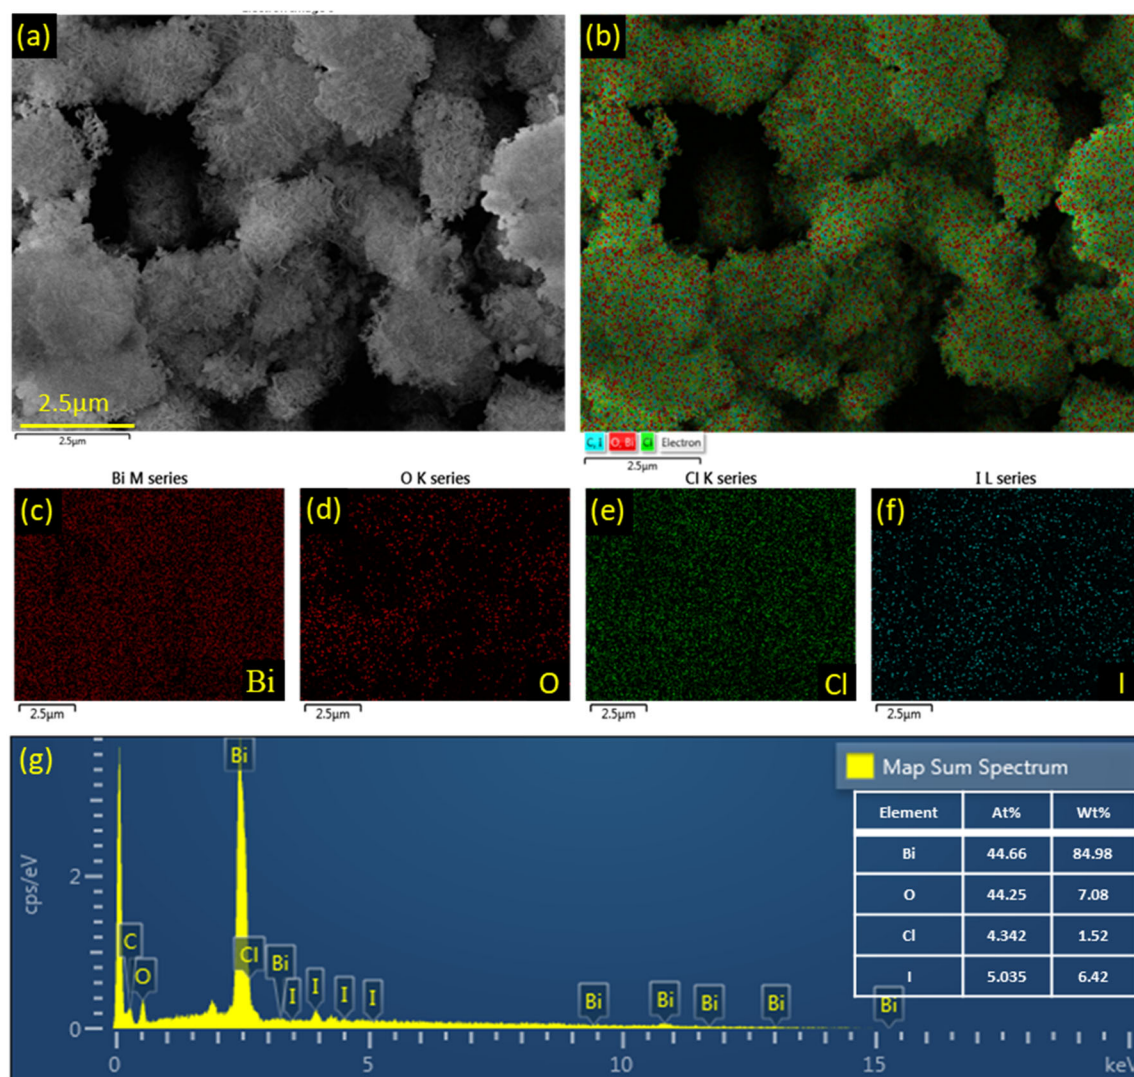

**Figure S4.** FESEM image of (a) BOC/BOI-3 composite and (b) its corresponding EDS sum image consists of four different colors: light red, dark red, green, and blue; these denote the presence of (c) Bi, (d) O, (e) Cl, and (f) I in the BOC/BOI-3 heterostructure, respectively (g) EDS spectrum of BOC/BOI-3 composite, with the inset table showing the atomic and elemental weight percentages of BOC/BOI-3 nano composite.

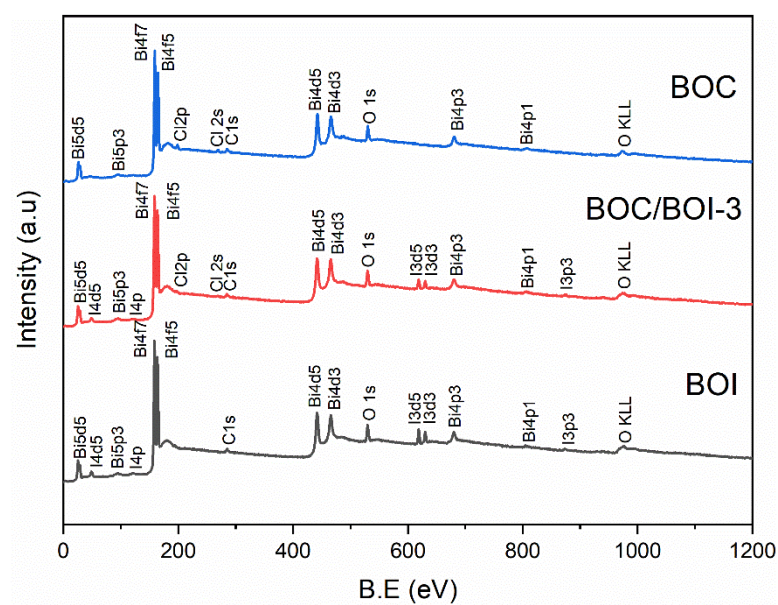

**Figure S5.** XPS survey spectra for BOC, BOI, and BOC/BOI based photocatalysts.



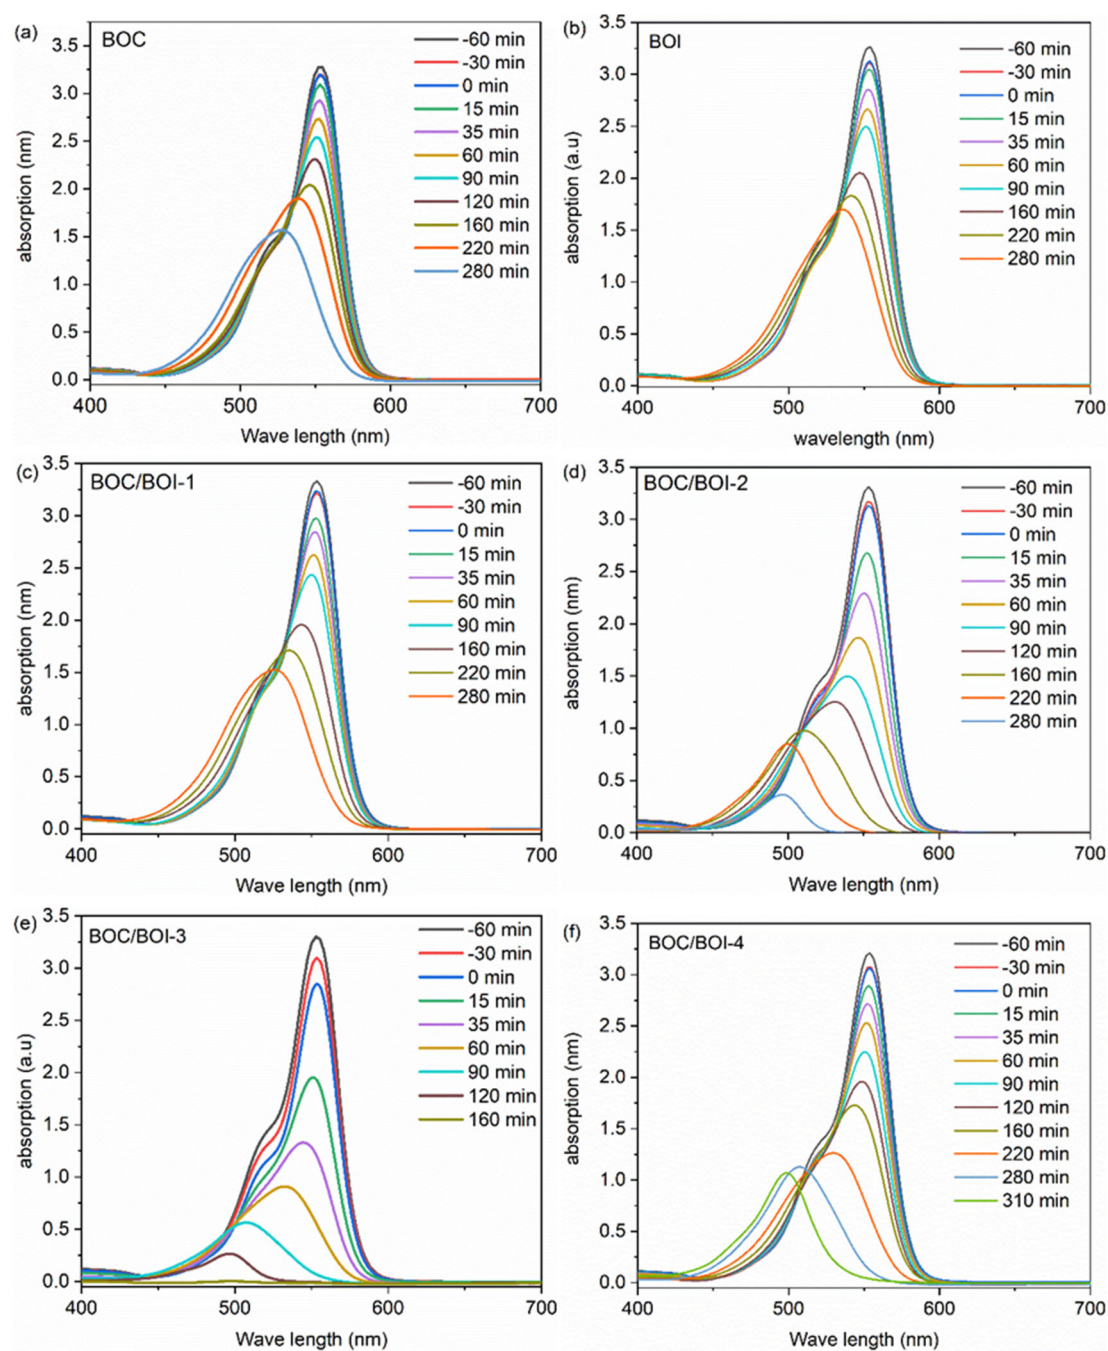

**Figure S6.** Time resolved absorption spectra of RhB degradation with (a) BOC, (b) BOI, (c) BOC/BOI-1, (d) BOC/BOI-2, (e) BOC/BOI-3, and (f) BOC/BOI-4 photocatalysts.

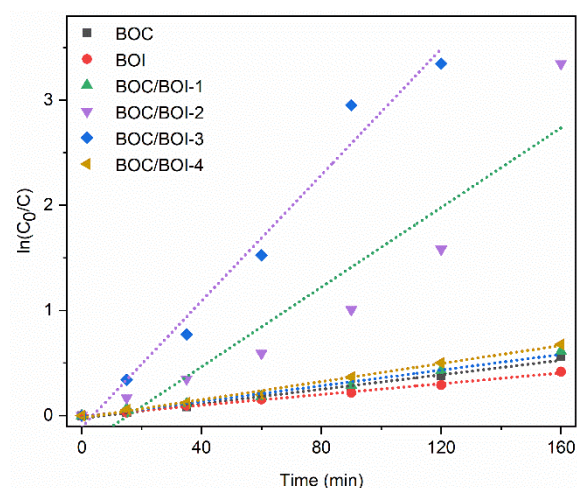

**Figure S7.** Pseudo first order reaction kinetic plots of BOC, BOI, BOC/BOI-1, BOC/BOI-2, BOC/BOI-3, and BOC/BOI-4 photocatalyst for RhB degradation.

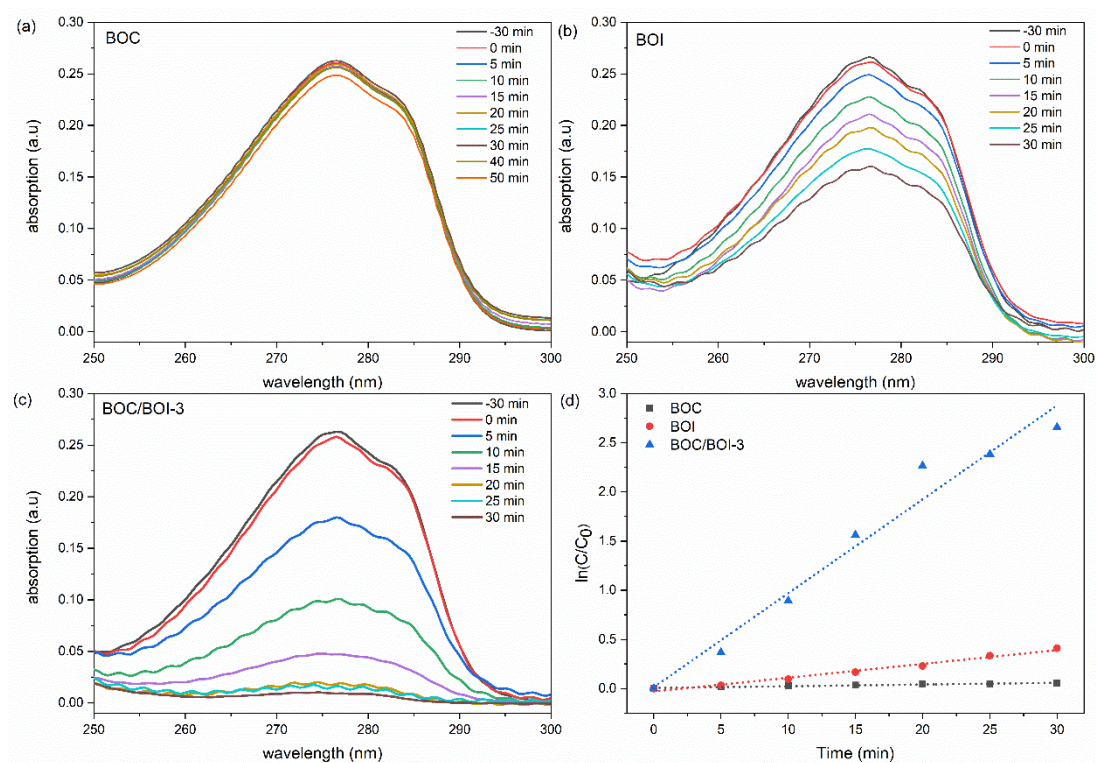

**Figure S8.** Time-resolved absorption spectra of RhB degradation with (a) BOC, (b) BOI, (c) BOC/BOI-3, and (d) Pseudo first order reaction kinetic plots of BOI, BOC, and BOC/BOI-3.

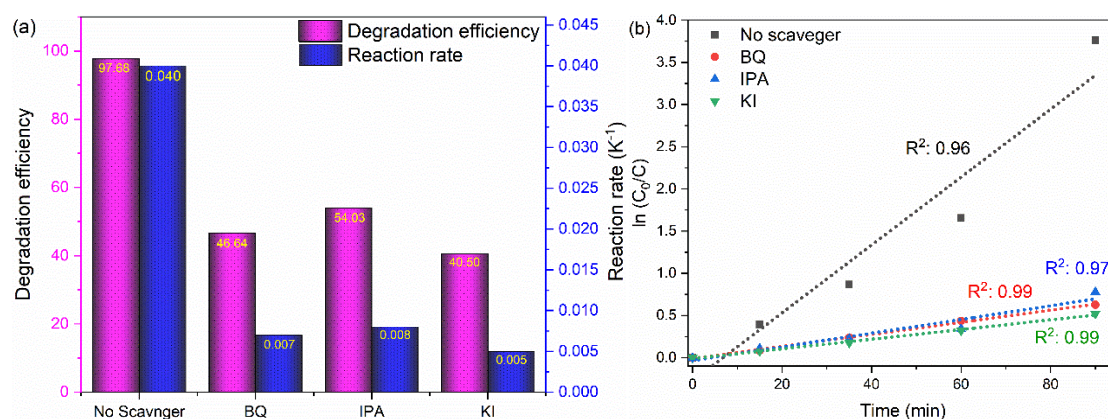

**Figure S9.** (a) Degradation efficiency with reaction rate constant and (b) 1st order reaction kinetics plot of RhB with and without scavengers in the presence of BOC/BOI-3.

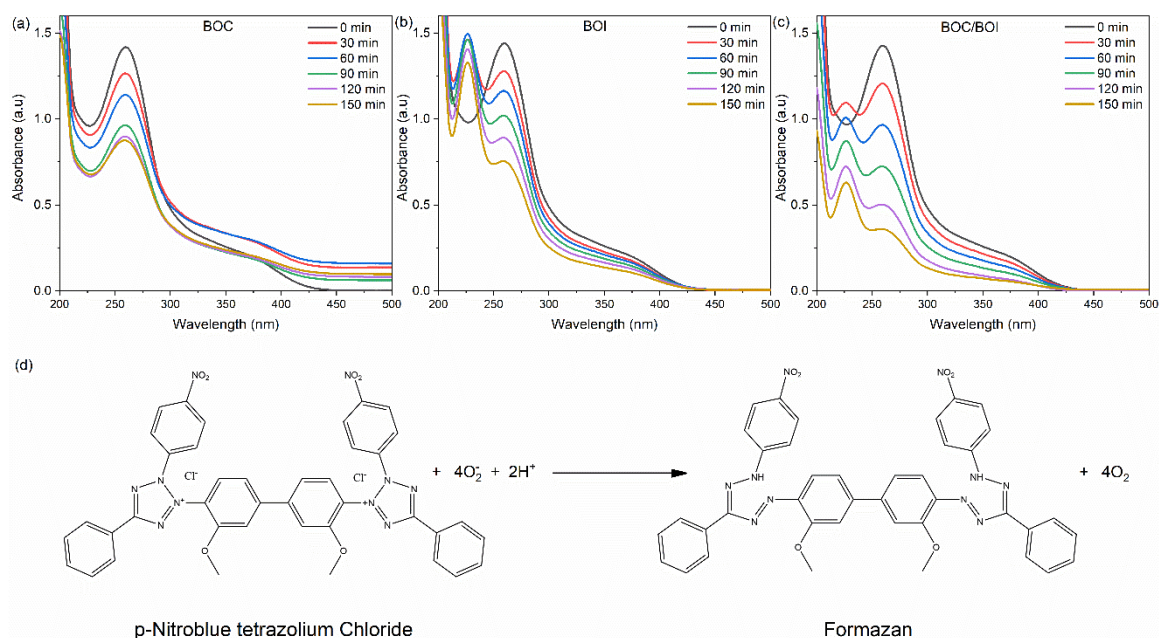

**Figure S10.** NBT degradation in the presence of (a) BOC, (b) BOI, and (c) BOC/BOI-3; (d) Chemical reaction for conversion of p-Nitroblue tetrazolium Chloride (NBT) to Formazan in the presence of super oxide radicals ( $\bullet O_2^-$ ).



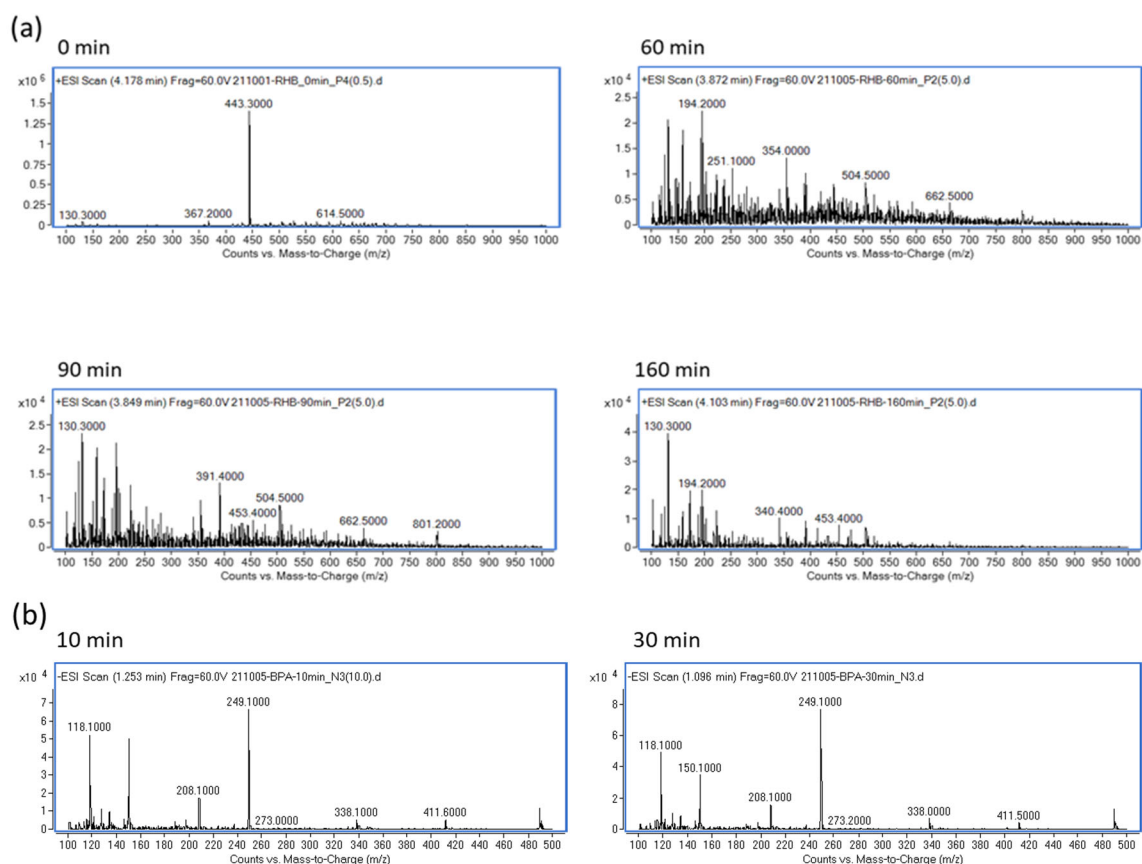

Figure S11. LC-MS of (a) RhB and (b) BPA after various photocatalytic reaction time.

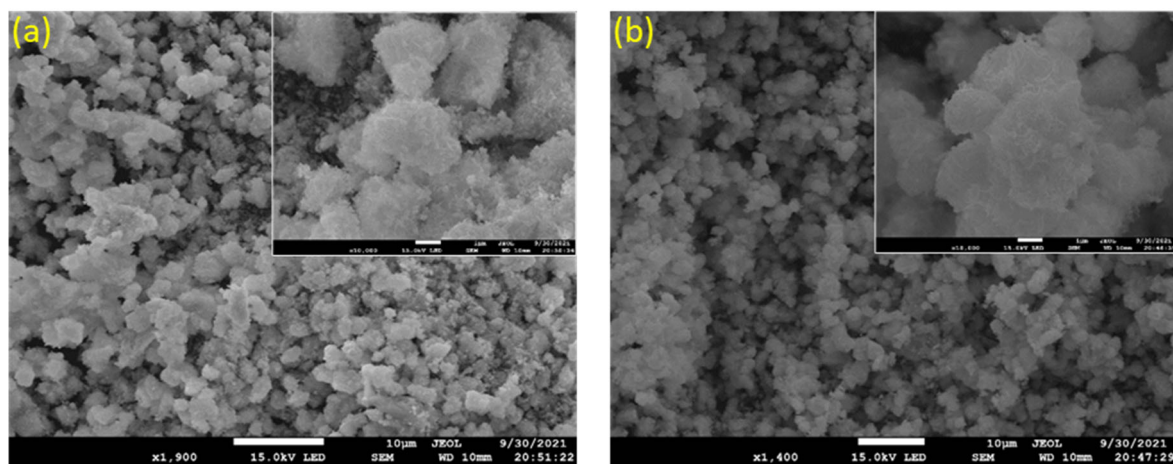

Figure S12. FESEM images BOC/BOI-3 heterostructures after (a) RhB and (b) BPA degradation.

Table S1. Obtained parameters from the TRPL curves.

| Sample    | A1                    | $\tau_1$ | A2       | $\tau_1$ | $\langle\tau\rangle$ |
|-----------|-----------------------|----------|----------|----------|----------------------|
| BOC *     | $5.64 \times 10^{12}$ | 0.53741  | 35.9181  | 7.42557  | 0.53741              |
| BOI       | $2.09 \times 10^{12}$ | 0.5551   | 31.54899 | 7.91884  | 0.55511              |
| BOC/BOI-3 | $3.26 \times 10^{12}$ | 0.92468  | 25.33757 | 8.80043  | 0.92474              |

**Table S2.** Comparison of photocatalytic degradation of RhB with recently reported literature.

| Photocatalyst                                                                      | Lamp (s)                 | Amount of catalyst (mg) | Solution volume (mL) | Solution concentration (mg.L <sup>-1</sup> ) | Degradation time (min) | Rate constant K (min <sup>-1</sup> ) | Removal rate (%) | Ref.      |
|------------------------------------------------------------------------------------|--------------------------|-------------------------|----------------------|----------------------------------------------|------------------------|--------------------------------------|------------------|-----------|
| Bi <sub>3</sub> O <sub>4</sub> Cl/ Bi <sub>5</sub> O <sub>7</sub> I                | 300 W, Xe lamp (<420 nm) | 10                      | 40                   | 17                                           | 90                     | 0.040                                | 97.68            | This work |
| Bi <sub>3</sub> O <sub>4</sub> Cl/g-C <sub>3</sub> N <sub>4</sub>                  | 350 W, Xe lamp (<420 nm) | 100                     | 100                  | 10                                           | 120                    | 0.019                                | 91.5             | [9]       |
| Bi <sub>3</sub> O <sub>4</sub> Cl/SrFe <sub>12</sub> O <sub>19</sub>               | 300 W, Xe lamp           | 100                     | 100                  | 10                                           | 80                     | 0.0387                               | 99.15            | [10]      |
| AgCl/Bi <sub>3</sub> O <sub>4</sub> Cl                                             | 350 W, Xe lamp (<420 nm) | 200                     | 100                  | --                                           | 70                     | 0.048                                | 99.5             | [11]      |
| AgI/Bi <sub>5</sub> O <sub>7</sub> I                                               | 350 W, Xe lamp (<420 nm) | 100                     | 100                  | 10                                           | 120                    | 0.046                                | 99               | [12]      |
| g-C <sub>3</sub> N <sub>4</sub> /Bi <sub>5</sub> O <sub>7</sub> I                  | 300 W, Xe lamp (<420 nm) | 40                      | 40                   | 10                                           | 20                     | 0.197                                | 98.2             | [13]      |
| g-C <sub>3</sub> N <sub>4</sub> /Bi <sub>5</sub> O <sub>7</sub> I                  | 500 W, Xe lamp (<420 nm) | 50                      | 50                   | 4.8                                          | 120                    | 0.0186                               | 90               | [14]      |
| Pal/Bi <sub>5</sub> O <sub>7</sub> I/Bi <sub>4</sub> O <sub>5</sub> I <sub>2</sub> | 300 W, Xe lamp (<420 nm) | 50                      | 100                  | 10                                           | 40                     | 0.08                                 | 99.9             | [15]      |
| Ag/AgBr/Bi <sub>5</sub> O <sub>7</sub> I                                           | 500 W, Xe lamp (<420 nm) | 50                      | 50                   | 5                                            | 60                     | 0.0557                               | 95               | [16]      |
| Bi <sub>5</sub> O <sub>7</sub> B <sub>0.5</sub> I <sub>0.5</sub>                   | 300 W, Xe lamp           | 50                      | 100                  | 20                                           | 120                    | --                                   | 68               | [17]      |
| BiOI/Mn <sub>x</sub> Zn <sub>1-x</sub> Fe <sub>2</sub> O <sub>4</sub>              | 250 W, Xe lamp           | 100                     | 100                  | 10                                           | 240                    | --                                   | 59               | [18]      |
| Bi <sub>4</sub> O <sub>5</sub> I <sub>2</sub> /Bi <sub>5</sub> O <sub>7</sub> I    | 500 W, Xe lamp (<420 nm) | 50                      | 50                   | 9.6                                          | 240                    | --                                   | 79               | [19]      |
| Bi <sub>3</sub> O <sub>4</sub> Cl/g-C <sub>3</sub> N <sub>4</sub>                  | 250 W, Xe lamp (<420 nm) | 50                      | 100                  | 10                                           | 90                     | --                                   | 98.3             | [20]      |

**Table S3.** Comparison of photocatalytic degradation of BPA with recently reported literature.

| Photocatalyst                                                                    | Lamp (s)                 | Amount of catalyst (mg) | Solution volume (mL) | Solution concentration (mg.L <sup>-1</sup> )                                  | Degradation time (min) | Rate constant K (min <sup>-1</sup> ) | Removal rate (%) | Ref.             |
|----------------------------------------------------------------------------------|--------------------------|-------------------------|----------------------|-------------------------------------------------------------------------------|------------------------|--------------------------------------|------------------|------------------|
| Bi <sub>3</sub> O <sub>4</sub> Cl/ Bi <sub>5</sub> O <sub>7</sub> I              | 300 W Xe lamp (<420 nm)  | 40                      | 40                   | 15                                                                            | 30                     | 0.094                                | 92.8             | <b>This work</b> |
| Bi <sub>4</sub> O <sub>5</sub> Br <sub>2</sub> /MnO <sub>2</sub>                 | 300 W Xe lamp (<420 nm)  | 40                      | 80                   | 20                                                                            | 180                    | 0.011                                | 87               | [21]             |
| Er <sup>3+</sup> /Fe <sup>3+</sup> co-doped Bi <sub>5</sub> O <sub>7</sub> I     | 400 W Xe lamp (<420 nm)  | 50                      | 50                   | 15                                                                            | 18                     | 0.2215                               | 100              | [22]             |
| Bi <sub>5</sub> O <sub>7</sub> I/UiO-67                                          | 800 W, Xe lamp (<290 nm) | 28                      | 40                   | 50                                                                            | 60                     | 0.05513                              | 99               | [23]             |
| Bi <sub>2</sub> O <sub>2</sub> CO <sub>3</sub> /Bi <sub>5</sub> O <sub>7</sub> I | 300 W Xe lamp (<400 nm)  | 50                      | 100                  | 10                                                                            | 60                     | 0.16635                              | 100              | [24]             |
| Bi <sub>12</sub> O <sub>17</sub> Cl <sub>2</sub> /MIL-100(Fe)                    | 300 W                    | 25                      | 200                  | 10 mg.L <sup>-1</sup> ,<br>ph:5.2<br>+ 0.2 mM Na <sub>2</sub> SO <sub>4</sub> | 60                     | 0.14713                              | 100              | [25]             |
| Bi <sub>2</sub> S <sub>3</sub> /g-C <sub>3</sub> N <sub>4</sub>                  | 500 W Xe lamp (<320 nm)  | 30                      | 50                   | 15                                                                            | 240                    | 0.2691                               | 71               | [26]             |
| C/TiO <sub>2</sub>                                                               | 300 W (<420 nm)          | 20                      | 100                  | 20                                                                            | 180                    | 0.01887                              | 98               | [27]             |
| ZnO/BiOI                                                                         | 100 W Xe lamp (<420 nm)  | 25                      | 50                   | 10                                                                            | 120                    | 0.0124                               | 70               | [28]             |
| Bi <sub>2</sub> MoO <sub>6</sub> /MIL-88B(Fe)                                    | 350 W Xe lamp (<420 nm)  |                         | 50                   | 20                                                                            | 120                    | --                                   | 54               | [29]             |
| 2D CN-Br <sub>0.12</sub> /2%RhO <sub>x</sub>                                     | 250 W Xe lamp (<420 nm)  | 10                      | 15                   | 10                                                                            | 9                      | --                                   | 100              | [30]             |
| Ag@AgVO <sub>3</sub> /Bi-OCl                                                     | Day light                | 50                      | 100                  | --                                                                            | 240                    | 0.0265                               | 52.8             | [31]             |
| CQDs/Bi <sub>5</sub> O <sub>7</sub> I                                            | 300 W Xe lamp (<400 nm)  | 50                      | 100                  | 10                                                                            | 120                    | --                                   | 94.2             | [32]             |
| Bi <sub>5</sub> O <sub>7</sub> B <sub>0.5</sub> I <sub>0.5</sub>                 | 300 W                    | 50                      | 100                  | 10                                                                            | 300                    | --                                   | 35               | [17]             |
| MoS <sub>2</sub> /Bi <sub>5</sub> O <sub>7</sub> I                               | 300 W Xe lamp (<400 nm)  | 50                      | 100                  | 10                                                                            | 60                     | --                                   | 99               | [33]             |
| Bi <sub>4</sub> O <sub>5</sub> I <sub>2</sub> /Bi <sub>5</sub> O <sub>7</sub> I  | 500 W, Xe lamp (<400 nm) | 50                      | 50                   | 10                                                                            | 240                    | --                                   | 94               | [19]             |

## References

1. Mian, F.; Bottaro, G.; Rancan, M.; Pezzato, L.; Gombac, V.; Fornasiero, P.; Armelao, L. Bi<sub>12</sub>O<sub>17</sub>Cl<sub>2</sub>/(BiO)<sub>2</sub>CO<sub>3</sub> Nanocomposite Materials for Pollutant Adsorption and Degradation: Modulation of the Functional Properties by Composition Tailoring. *ACS Omega* **2017**, *2*, 6298–6308, doi:10.1021/acsomega.7b01125.
2. Han, L.; Guo, Y.; Lin, Z.; Huang, H. 0D to 3D Controllable Nanostructures of BiOBr via a Facile and Fast Room-Temperature Strategy. *Colloids Surf. A: Physicochem. Eng. Asp.* **2020**, *603*, 125233, doi:10.1016/j.colsurfa.2020.125233.
3. Cui, B.; Cui, H.; Li, Z.; Dong, H.; Li, X.; Zhao, L.; Wang, J. Novel Bi<sub>3</sub>O<sub>5</sub>I<sub>2</sub> Hollow Microsphere and Its Enhanced Photocatalytic Activity. *Catal.* **2019**, *9*, 709, doi:10.3390/catal9090709.
4. Yu, C.; Fan, C.; Yu, J.C.; Zhou, W.; Yang, K. Preparation of Bismuth Oxyiodides and Oxides and Their Photooxidation Characteristic under Visible/UV Light Irradiation. *Mater. Res. Bull.* **2011**, *46*, 140–146, doi:10.1016/j.materresbull.2010.08.013.
5. Liao, C.; Ma, Z.; Chen, X.; He, X.; Qiu, J. Controlled Synthesis of Bismuth Oxyiodide toward Optimization of Photocatalytic Performance. *Appl. Surf. Sci.* **2016**, *387*, 1247–1256, doi:10.1016/j.apsusc.2016.06.140.
6. Sun, X.; Wu, J.; Li, Q.; Liu, Q.; Qi, Y.; You, L.; Ji, Z.; He, P.; Sheng, P.; Ren, J.; et al. Fabrication of BiOI/O<sub>3</sub> with Induced Oxygen Vacancies for Efficient Separation of the Electron-Hole Pairs. *Appl. Catal. B: Environ.* **2017**, *218*, 80–90, doi:10.1016/j.apcatb.2017.06.041.
7. Mera, A.C.; Rodríguez, C.A.; Meléndrez, M.F.; Valdés, H. Synthesis and Characterization of BiOI Microspheres under Standardized Conditions. *J Mater Sci* **2017**, *52*, 944–954, doi:10.1007/s10853-016-0390-x.
8. Long, M.; Hu, P.; Wu, H.; Chen, Y.; Tan, B.; Cai, W. Understanding the Composition and Electronic Structure Dependent Photocatalytic Performance of Bismuth Oxyiodides. *J. Mater. Chem. A* **2015**, *3*, 5592–5598, doi:10.1039/C4TA06134A.
9. Ma, Y.; Chen, Y.; Feng, Z.; Zeng, L.; Chen, Q.; Jin, R.; Lu, Y.; Huang, Y.; Wu, Y.; He, Y. Preparation, Characterization of Bi<sub>3</sub>O<sub>4</sub>Cl/g-C<sub>3</sub>N<sub>4</sub> Composite and Its Photocatalytic Activity in Dye Degradation. *J. Water Process Eng.* **2017**, *18*, 65–72, doi:10.1016/j.jwpe.2017.06.002.
10. Wang, H.; Xu, L.; Liu, C.; Jiang, Z.; Feng, Q.; Wu, T.; Wang, R. A Novel Magnetic Photocatalyst Bi<sub>3</sub>O<sub>4</sub>Cl/SrFe<sub>12</sub>O<sub>19</sub>: Fabrication, Characterization and Its Photocatalytic Activity. *Ceram. Int.* **2020**, *46*, 460–467, doi:10.1016/j.ceramint.2019.08.283.
11. Huang, Y.; He, Y.; Cui, M.; Nong, Q.; Yu, J.; Wu, F.; Meng, X. Synthesis of AgCl/Bi<sub>3</sub>O<sub>4</sub>Cl Composite and Its Photocatalytic Activity in RhB Degradation under Visible Light. *Catal. Commun.* **2016**, *76*, 19–22, doi:10.1016/j.catcom.2015.12.018.
12. Cui, M.; Yu, J.; Lin, H.; Wu, Y.; Zhao, L.; He, Y. In-Situ Preparation of Z-Scheme AgI/Bi<sub>5</sub>O<sub>7</sub>I Hybrid and Its Excellent Photocatalytic Activity. *Appl. Surf. Sci.* **2016**, *387*, 912–920, doi:10.1016/j.apsusc.2016.07.024.
13. Geng, X.; Chen, S.; Lv, X.; Jiang, W.; Wang, T. Synthesis of G-C<sub>3</sub>N<sub>4</sub>/Bi<sub>5</sub>O<sub>7</sub>I Microspheres with Enhanced Photocatalytic Activity under Visible Light. *Appl. Surf. Sci.* **2018**, *462*, 18–28, doi:10.1016/j.apsusc.2018.08.080.
14. Liu, C.; Huang, H.; Du, X.; Zhang, T.; Tian, N.; Guo, Y.; Zhang, Y. In Situ Co-Crystallization for Fabrication of g-C<sub>3</sub>N<sub>4</sub>/Bi<sub>5</sub>O<sub>7</sub>I Heterojunction for Enhanced Visible-Light Photocatalysis. *J. Phys. Chem. C* **2015**, *119*, 17156–17165, doi:10.1021/acs.jpcc.5b03707.
15. Luo, Y.; Zhang, M.; Yin, H.; Yao, J.; Chen, S.; Liu, X. One Pot Controllable Synthesis of Palygorskite/Bismuth Oxyiodide Hierarchical Microspheres for Improved Visible-Light Photocatalytic Performance. *Colloids Surf. A: Physicochem. Eng. Asp.* **2019**, *578*, 123573, doi:10.1016/j.colsurfa.2019.06.038.
16. Zhao, Z.; Wang, M.; Yang, T.; Fang, M.; Zhang, L.; Zhu, H.; Tang, C.; Huang, Z. In Situ Co-Precipitation for the Synthesis of an Ag/AgBr/Bi<sub>5</sub>O<sub>7</sub>I Heterojunction for Enhanced Visible-Light Photocatalysis. *J. Mol. Catal. A: Chem.* **2016**, *424*, 8–16, doi:10.1016/j.molcata.2016.08.004.
17. Bai, Y.; Shi, X.; Wang, P.; Wang, L.; Xie, H.; Li, Z.; Qu, L.; Ye, L. Synthesis of One-Dimensional Bi<sub>5</sub>O<sub>7</sub>Br<sub>0.5</sub>I<sub>0.5</sub> Solid Solution for Effective Real Oilfield Wastewater Treatment via Exciton Photocatalytic Process. *J. Taiwan Inst. Chem. Eng.* **2018**, *91*, 358–368, doi:10.1016/j.jtice.2018.05.045.



18. Feng, S.; Du, H.; Xie, T.; Xu, L.; Wang, Y. Preparation and Photocatalytic Activity of BiOI/Mn<sub>x</sub>Zn<sub>1-x</sub>Fe<sub>2</sub>O<sub>4</sub> Magnetic Photocatalyst. *Ceram. Int.* **2019**, *45*, 10468–10474, doi:10.1016/j.ceramint.2019.02.108.
19. Huang, H.; Xiao, K.; Zhang, T.; Dong, F.; Zhang, Y. Rational Design on 3D Hierarchical Bismuth Oxyiodides via in Situ Self-Template Phase Transformation and Phase-Junction Construction for Optimizing Photocatalysis against Diverse Contaminants. *Appl. Catal. B: Environ.* **2017**, *203*, 879–888, doi:10.1016/j.apcatb.2016.10.082.
20. Che, H.; Che, G.; Dong, H.; Hu, W.; Hu, H.; Liu, C.; Li, C. Fabrication of Z-Scheme Bi<sub>2</sub>O<sub>3</sub>Cl/g-C<sub>3</sub>N<sub>4</sub> 2D/2D Heterojunctions with Enhanced Interfacial Charge Separation and Photocatalytic Degradation Various Organic Pollutants Activity. *Appl. Surf. Sci.* **2018**, *455*, 705–716, doi:10.1016/j.apsusc.2018.06.038.
21. Chang, F.; Yan, W.; Wang, X.; Peng, S.; Li, S.; Hu, X. Strengthened Photocatalytic Removal of Bisphenol a by Robust 3D Hierarchical N-p Heterojunctions Bi<sub>4</sub>O<sub>5</sub>Br<sub>2</sub>-MnO<sub>2</sub> via Boosting Oxidative Radicals Generation. *Chem. Eng. J.* **2022**, *428*, 131223, doi:10.1016/j.cej.2021.131223.
22. Liu, Y.; Zhu, G.; Gao, J.; Zhu, R.; Hojamberdiev, M.; Wang, C.; Wei, X.; Liu, P. A Novel Synergy of Er<sup>3+</sup>/Fe<sup>3+</sup> Co-Doped Porous Bi<sub>5</sub>O<sub>7</sub>I Microspheres with Enhanced Photocatalytic Activity under Visible-Light Irradiation. *Appl. Catal. B: Environ.* **2017**, *205*, 421–432, doi:10.1016/j.apcatb.2016.12.061.
23. Cao, C.-S.; Wang, J.; Yu, X.; Zhang, Y.; Zhu, L. Photodegradation of Seven Bisphenol Analogues by Bi<sub>5</sub>O<sub>7</sub>I/UiO-67 Heterojunction: Relationship between the Chemical Structures and Removal Efficiency. *Appl. Catal. B: Environ.* **2020**, *277*, 119222, doi:10.1016/j.apcatb.2020.119222.
24. Guo, Y.; Nan, J.; Xu, Y.; Cui, F.; Shi, W.; Zhu, Y. Thermodynamic and Dynamic Dual Regulation Bi<sub>2</sub>O<sub>2</sub>CO<sub>3</sub>/Bi<sub>5</sub>O<sub>7</sub>I Enabling High-Flux Photogenerated Charge Migration for Enhanced Visible-Light-Driven Photocatalysis. *J. Mater. Chem. A* **2020**, *8*, 10252–10259, doi:10.1039/D0TA02588G.
25. Zhao, C.; Wang, J.; Chen, X.; Wang, Z.; Ji, H.; Chen, L.; Liu, W.; Wang, C.-C. Bifunctional Bi<sub>12</sub>O<sub>17</sub>Cl<sub>2</sub>/MIL-100(Fe) Composites toward Photocatalytic Cr(VI) Sequestration and Activation of Persulfate for Bisphenol A Degradation. *Science of The Total Environment* **2021**, *752*, 141901, doi:10.1016/j.scitotenv.2020.141901.
26. Gu, J.; Yu, Y.; Chen, S.; Shi, W.; Wang, Y.; Liao, Y.; Chen, H.; Jiang, F. Heterojunction Photocatalyst of Cavity Shaped Bi<sub>2</sub>S<sub>3</sub>/g-C<sub>3</sub>N<sub>4</sub> for Bisphenol a Degradation: Regulation of Internal Electric Field via Assistance of Interfacial Functional Groups. *Chem. Eng. J.* **2021**, *424*, 130539, doi:10.1016/j.cej.2021.130539.
27. He, X.; Wu, M.; Ao, Z.; Lai, B.; Zhou, Y.; An, T.; Wang, S. Metal–Organic Frameworks Derived C/TiO<sub>2</sub> for Visible Light Photocatalysis: Simple Synthesis and Contribution of Carbon Species. *J. Hazard. Mater.* **2021**, *403*, 124048, doi:10.1016/j.jhazmat.2020.124048.
28. Feng, H.; Liang, L.; Wu, W.; Huang, Z.; Liu, Y. Architecting Epitaxial-Lattice-Mismatch-Free (LMF) Zinc Oxide/Bismuth Oxyiodide Nano-Heterostructures for Efficient Photocatalysis. *J. Mater. Chem. C* **2020**, *8*, 11263–11273, doi:10.1039/D0TC02607G.
29. Zhao, K.; Zhang, Z.; Feng, Y.; Lin, S.; Li, H.; Gao, X. Surface Oxygen Vacancy Modified Bi<sub>2</sub>MoO<sub>6</sub>/MIL-88B(Fe) Heterostructure with Enhanced Spatial Charge Separation at the Bulk & Interface. *Appl. Catal. B: Environ.* **2020**, *268*, 118740, doi:10.1016/j.apcatb.2020.118740.
30. Fei, H.; Shao, J.; Li, H.; Li, N.; Chen, D.; Xu, Q.; He, J.; Lu, J. Construction of Ultra-Thin 2D CN-Br<sub>0.12</sub>/2%RhO<sub>x</sub> Photo-Catalyst with Rapid Electron and Hole Separation for Efficient Bisphenol A Degradation. *Appl. Catal. B: Environ.* **2021**, *299*, 120623, doi:10.1016/j.apcatb.2021.120623.
31. Kuila, A.; Saravanan, P.; Bahnemann, D.; Wang, C. Novel Ag Decorated, BiOCl Surface Doped AgVO<sub>3</sub> Nanobelt Ternary Composite with Z-Scheme Homo Junction-Heterojunction Interface for High Prolific Photo Switching, Quantum Efficiency and Hole Mediated Photocatalysis. *Appl. Catal. B: Environ.* **2021**, *293*, 120224, doi:10.1016/j.apcatb.2021.120224.

- 
32. Chen, R.; Chen, Z.; Ji, M.; Chen, H.; Liu, Y.; Xia, J.; Li, H. Enhanced Reactive Oxygen Species Activation for Building Carbon Quantum Dots Modified Bi<sub>5</sub>O<sub>7</sub>I Nanorod Composites and Optimized Visible-Light-Response Photocatalytic Performance. *J. Colloid Interface Sci.* **2018**, *532*, 727–737, doi:10.1016/j.jcis.2018.07.027.
  33. Yin, S.; Chen, R.; Ji, M.; Jiang, Q.; Li, K.; Chen, Z.; Xia, J.; Li, H. Construction of Ultrathin MoS<sub>2</sub>/Bi<sub>5</sub>O<sub>7</sub>I Composites: Effective Charge Separation and Increased Photocatalytic Activity. *J. Colloid Interface Sci.* **2020**, *560*, 475–484, doi:10.1016/j.jcis.2019.10.081.
